# Supplementary material for: Correlation of mucosal healing endpoints with long-term clinical and patient-reported outcomes in ulcerative colitis
Source: PubMed Central journal article supplement (PMC10522527; doi:10.1007/s00535-023-02013-7), 2023-07-25
Supplement: 535_2023_2013_MOESM1_ESM.pdf [file 535_2023_2013_MOESM1_ESM.pdf]

## SUPPLEMENTAL MATERIALS

Correlation of Mucosal Healing Endpoints with Long-Term Clinical and Patient-Reported Outcomes in Ulcerative Colitis

Gareth Parkes<sup>1</sup>, Ryan C. Ungaro<sup>2</sup>, Silvio Danese<sup>3</sup>, Maria T. Abreu<sup>4</sup>, Ethan Arenson<sup>5</sup>, Wen Zhou<sup>6</sup>, Dapo Ilo<sup>6</sup>, F. Stephen Laroux<sup>7</sup>, Huiwen Deng<sup>6,8</sup>, Yuri Sanchez Gonzalez<sup>6</sup>, Laurent Peyrin-Biroulet<sup>9</sup>

<sup>1</sup>Barts Health NHS Trust, London, UK; Barts and the London School of Medicine and Dentistry, London, UK; <sup>2</sup>Division of Gastroenterology, Icahn School of Medicine at Mount Sinai, New York, NY, USA; <sup>3</sup>Gastroenterology and Endoscopy, IRCCS Ospedale San Raffaele, Milano Italy; <sup>4</sup>Division of Gastroenterology, Crohn's and Colitis Center, University of Miami Miller School of Medicine, Miami, FL, USA; <sup>5</sup>Adelphi Values, Boston, MA, USA; <sup>6</sup>AbbVie Inc., Chicago, IL, USA; <sup>7</sup>AbbVie Bioresearch Center Worcester, MA, USA; <sup>8</sup>Department of Pharmacy Systems Outcomes and Policy, University of Illinois at Chicago, Chicago, IL, USA; <sup>9</sup>University Hospital of Nancy, Lorraine University, Vandoeuvre, France

Corresponding author:

Gareth Parkes

Email: [gareth.parkes@nhs.net](mailto:gareth.parkes@nhs.net)

*Journal of Gastroenterology*

**Supplemental Table 1: Cross-sectional analyses: adjusted odds ratios for HEMR or HEMI at Week 52 (end of maintenance ) and clinical outcomes at Week 52 in U-ACHIEVE**

| Outcomes at Week 52 <sup>a</sup>                                                                          | Separate regressions for HEMR and HEMI                     |         |                                                            |         |
|-----------------------------------------------------------------------------------------------------------|------------------------------------------------------------|---------|------------------------------------------------------------|---------|
|                                                                                                           | HEMR (n=55 <sup>b</sup> ) vs no HEMR (n=146 <sup>b</sup> ) |         | HEMI (n=124 <sup>b</sup> ) vs no HEMI (n=77 <sup>b</sup> ) |         |
|                                                                                                           | Adjusted Odds ratio (95% CI) <sup>c</sup>                  | P value | Adjusted Odds ratio (95% CI) <sup>c</sup>                  | P value |
| <b>Clinical Outcomes</b>                                                                                  |                                                            |         |                                                            |         |
| Corticosteroid-free remission <sup>b,d</sup>                                                              | 19.1 (6.6, 55.3)                                           | <.001   | 179.8 (37.5, 861.7)                                        | <.001   |
| Sustained clinical response <sup>b,e</sup>                                                                | 11.1 (2.6, 47.5)                                           | .001    | 18.4 (5.8, 58.2)                                           | <.001   |
| Clinical remission per full Mayo score <sup>b,f</sup>                                                     | 67.1 (16.3, 275.7)                                         | <.001   | 128.5 (32.1, 513.9)                                        | <.001   |
| Clinical remission per adapted Mayo score <sup>b,g</sup>                                                  | 31.3 (8.9, 109.9)                                          | <.001   | 373.3 (66.1, >999.99)                                      | <.001   |
| Endoscopic remission <sup>b,h</sup>                                                                       | N/A due to HEMR definition                                 |         | 158.4 (17.3, >999.99)                                      | <.001   |
| Clinical and endoscopic remission per full Mayo score <sup>b,f,h</sup>                                    | >999.99 (149.0, >999.99)                                   | <.001   | 104.7 (12.3, 889.5)                                        | <.001   |
| Clinical and endoscopic remission per adapted Mayo score <sup>b,g,h</sup>                                 | >999.99 (149.0, >999.99)                                   | <.001   | 104.7 (12.3, 889.5)                                        | <.001   |
| Rectal bleeding = 0 <sup>b</sup>                                                                          | 12.5 (2.3, 68.1)                                           | .004    | 12.3 (3.7, 40.5)                                           | <.001   |
| Stool frequency ≤1 <sup>b</sup>                                                                           | 17.1 (4.3, 68.0)                                           | <.001   | 9.3 (4.0, 21.8)                                            | <.001   |
| Endoscopic improvement <sup>b,i</sup>                                                                     | N/A due to HEMR definition                                 |         | N/A due to HEMI definition                                 |         |
| FCP ranges <sup>j</sup>                                                                                   |                                                            |         |                                                            |         |
| FCP ≤150 µg/g                                                                                             | 3.5 (1.6, 7.6)                                             | .002    | 4.9 (2.3, 10.5)                                            | <.001   |
| FCP ≤250 µg/g                                                                                             | 3.7 (1.6, 8.5)                                             | .003    | 3.9 (1.9, 8.2)                                             | <.001   |
| <b>Clinically meaningful improvement from induction baseline in patient-reported outcomes<sup>k</sup></b> |                                                            |         |                                                            |         |
| FACIT-F (≥5) <sup>b</sup>                                                                                 | 1.6 (0.8, 3.4)                                             | .182    | 1.7 (0.9, 3.3)                                             | .124    |
| UC-SQ (≥10) <sup>b</sup>                                                                                  | 3.0 (1.2, 7.4)                                             | .020    | 3.5 (1.7, 7.4)                                             | <.001   |
| IBDQ (≥16) <sup>b</sup>                                                                                   | 2.3 (0.8, 6.1)                                             | .111    | 5.3 (2.3, 12.6)                                            | <.001   |
| SF-36 PCS (≥4.1) <sup>j</sup>                                                                             | 2.5 (1.1, 5.8)                                             | .038    | 3.4 (1.6, 7.3)                                             | .002    |

| Outcomes at Week 52 <sup>a</sup>           | Separate regressions for HEMR and HEMI                     |         |                                                            |         |
|--------------------------------------------|------------------------------------------------------------|---------|------------------------------------------------------------|---------|
|                                            | HEMR (n=55 <sup>b</sup> ) vs no HEMR (n=146 <sup>b</sup> ) |         | HEMI (n=124 <sup>b</sup> ) vs no HEMI (n=77 <sup>b</sup> ) |         |
|                                            | Adjusted Odds ratio (95% CI) <sup>c</sup>                  | P value | Adjusted Odds ratio (95% CI) <sup>c</sup>                  | P value |
| SF-36 MCS (≥4.1) <sup>j</sup>              | 3.8 (1.7, 8.5)                                             | .001    | 2.8 (1.4, 5.7)                                             | .006    |
| EQ-5D-5L index (≥0.076) <sup>j</sup>       | 2.1 (0.9, 4.5)                                             | .073    | 4.6 (2.1, 10.2)                                            | <.001   |
| WPAI                                       |                                                            |         |                                                            |         |
| Work time missed ≥6.5 <sup>l</sup>         | 0.8 (0.3, 2.3)                                             | .655    | 1.1 (0.4, 2.8)                                             | .893    |
| Impairment while working ≥6.1 <sup>l</sup> | 1.7 (0.3, 9.6)                                             | .529    | 2.9 (0.7, 11.4)                                            | .139    |
| Overall work impairment ≥7.3 <sup>l</sup>  | 2.3 (0.4, 12.0)                                            | .335    | 3.1 (0.8, 11.8)                                            | .100    |
| Activity impairment ≥8.5                   | 1.9 (0.7, 5.1)                                             | .195    | 4.1 (1.7, 9.8)                                             | .001    |

<sup>a</sup>NRI-NC was conducted in all Week 52 outcomes.

<sup>b</sup>N = 201, includes patients who achieved a clinical response after 8 weeks or 16 weeks of upadacitinib induction treatment.

<sup>c</sup>Adjusted for maintenance baseline Geboes histologic score, dosage, gender, age, weight, UC disease extent, UC disease duration, and use of extended therapy (16-week induction period). Due to the adjustment of covariates, patients with missing values on the covariates were dropped in the logistic regressions.

<sup>d</sup>Steroid-free remission was defined as achieved 90-day steroid-free remission per adapted Mayo in patients who achieved clinical remission at the end of induction treatment.

<sup>e</sup>Sustained clinical response was defined as remained clinically responsive at the end of Week 52.

<sup>f</sup>Clinical remission per full Mayo was defined as total Mayo score ≤2 with no subscore >1.

<sup>g</sup>Clinical remission per adapted Mayo (full Mayo excluding physician's global assessment) was defined as stool frequency subscore ≤1 and not greater than baseline, rectal bleeding subscore = 0, endoscopic subscore ≤1 without friability.

<sup>h</sup>Endoscopic remission defined as Mayo endoscopic subscore = 0.

<sup>i</sup>Endoscopic improvement defined as Mayo endoscopic subscore ≤1.

<sup>j</sup>N = 172, includes only patients who achieved a clinical response after 8 weeks of upadacitinib induction treatment.

<sup>k</sup>Clinically meaningful improvement in patient-reported outcomes was assessed as the likelihood of achieving a change from induction baseline in patient-reported outcome score ≥ the corresponding meaningful within-patient change threshold.

<sup>l</sup>Only includes patients who had baseline WPAI scores. N=154 for work time missed, N=142 for impairment while working, N=154 for overall work impairment.

CI = confidence interval; EQ-5D-5L, European Quality of Life Five Dimensions Five Levels; FACIT-F = Functional Assessment of Chronic Illness Therapy–Fatigue; FCP = fecal calprotectin; HEMI = histologic endoscopic mucosal improvement; HEMR = histologic endoscopic mucosal remission; IBDQ = Inflammatory Bowel Disease Questionnaire; N/A = not applicable; NRI-NC = non-responder imputation with no special data handling for missing due to COVID-19; SF-36 MCS = Short Form Health Survey Mental Component Summary; SF-36 PCS = Short Form Health Survey Physical Component Summary; UC = ulcerative colitis; UC-SQ = Ulcerative Colitis Symptoms Questionnaire; WPAI = Work Productivity and Activity Impairment Questionnaire.

**Supplemental Table 2. Predictive analyses: adjusted odds ratios for HEMR or HEMI at Week 8/16 (end of induction) and outcomes at Week 52 (end of maintenance) in U-ACHIEVE**

| Outcomes at Week 52 <sup>a</sup>                                                                          | Separate regressions for HEMR and HEMI                         |         |                                                                |         |
|-----------------------------------------------------------------------------------------------------------|----------------------------------------------------------------|---------|----------------------------------------------------------------|---------|
|                                                                                                           | HEMR (n = 45 <sup>b</sup> ) vs no HEMR (n = 275 <sup>b</sup> ) |         | HEMI (n = 123 <sup>b</sup> ) vs no HEMI n = 197 <sup>b</sup> ) |         |
|                                                                                                           | Adjusted Odds ratio (95% CI) <sup>c</sup>                      | P value | Adjusted Odds ratio (95% CI) <sup>c</sup>                      | P value |
| <b>Clinical Outcomes</b>                                                                                  |                                                                |         |                                                                |         |
| Corticosteroid-free remission <sup>b,d</sup>                                                              | 2.6 (1.3, 5.4)                                                 | .009    | 3.1 (1.8, 5.3)                                                 | <.001   |
| Sustained clinical response <sup>b,e</sup>                                                                | 2.3 (1.0, 5.1)                                                 | .042    | 2.1 (1.2, 3.7)                                                 | .006    |
| Clinical remission per full Mayo score <sup>b,f</sup>                                                     | 1.7 (0.8, 3.4)                                                 | .157    | 2.8 (1.6, 4.7)                                                 | <.001   |
| Clinical remission per adapted Mayo score <sup>b,g</sup>                                                  | 2.4 (1.2, 4.9)                                                 | .018    | 3.3 (1.9, 5.6)                                                 | <.001   |
| Endoscopic remission <sup>b,h</sup>                                                                       | 2.7 (1.3, 5.8)                                                 | .008    | 2.8 (1.6, 5.2)                                                 | <.001   |
| Clinical and endoscopic remission per full Mayo score <sup>b,g,h</sup>                                    | 2.1 (1.0, 4.6)                                                 | .051    | 2.8 (1.5, 5.2)                                                 | <.001   |
| Clinical and endoscopic remission per adapted Mayo score <sup>b,g,h</sup>                                 | 2.3 (1.1, 5.1)                                                 | .029    | 2.9 (1.6, 5.4)                                                 | <.001   |
| Rectal bleeding = 0 <sup>b</sup>                                                                          | 2.8 (1.2, 6.8)                                                 | .018    | 2.2 (1.2, 3.8)                                                 | .006    |
| Stool frequency ≤1 <sup>b</sup>                                                                           | 2.1 (1.0, 4.6)                                                 | .054    | 2.2 (1.3, 3.7)                                                 | .003    |
| Endoscopic improvement <sup>b,i</sup>                                                                     | 3.3 (1.5, 7.1)                                                 | .002    | 3.7 (2.1, 6.4)                                                 | <.001   |
| FCP ranges <sup>j</sup>                                                                                   |                                                                |         |                                                                |         |
| FCP ≤150 µg/g                                                                                             | 2.0 (1.0, 4.1)                                                 | .073    | 1.8 (1.1, 3.1)                                                 | .027    |
| FCP ≤250 µg/g                                                                                             | 2.6 (1.2, 5.5)                                                 | .016    | 2.3 (1.3, 4.0)                                                 | .003    |
| <b>Clinically meaningful improvement from induction baseline in patient-reported outcomes<sup>k</sup></b> |                                                                |         |                                                                |         |
| FACIT-F (≥5) <sup>b</sup>                                                                                 | 1.4 (0.7, 2.8)                                                 | .340    | 1.2 (0.7, 2.0)                                                 | .462    |
| UC-SQ (≥10) <sup>b</sup>                                                                                  | 2.4 (1.1, 5.2)                                                 | .031    | 1.7 (1.0, 2.8)                                                 | .051    |
| IBDQ (≥16) <sup>b</sup>                                                                                   | 1.3 (0.6, 2.8)                                                 | .496    | 1.1 (0.7, 2.0)                                                 | .634    |
| SF-36 PCS (≥4.1) <sup>j</sup>                                                                             | 1.1 (0.5, 2.3)                                                 | .816    | 1.3 (0.8, 2.3)                                                 | .287    |
| SF-36 MCS (≥4.1) <sup>j</sup>                                                                             | 1.3 (0.6, 2.6)                                                 | .508    | 1.0 (0.6, 1.8)                                                 | .888    |
| EQ-5D-5L index (≥0.076) <sup>j</sup>                                                                      | 1.5 (0.7, 3.2)                                                 | .267    | 0.9 (0.5, 1.6)                                                 | .768    |

| Outcomes at Week 52 <sup>a</sup>           | Separate regressions for HEMR and HEMI                         |         |                                                                |         |
|--------------------------------------------|----------------------------------------------------------------|---------|----------------------------------------------------------------|---------|
|                                            | HEMR (n = 45 <sup>b</sup> ) vs no HEMR (n = 275 <sup>b</sup> ) |         | HEMI (n = 123 <sup>b</sup> ) vs no HEMI n = 197 <sup>b</sup> ) |         |
|                                            | Adjusted Odds ratio (95% CI) <sup>c</sup>                      | P value | Adjusted Odds ratio (95% CI) <sup>c</sup>                      | P value |
| WPAI                                       |                                                                |         |                                                                |         |
| Work time missed ≥6.5 <sup>l</sup>         | 0.9 (0.3, 3.1)                                                 | .924    | 0.7 (0.3, 1.6)                                                 | .428    |
| Impairment while working ≥6.1 <sup>l</sup> | 1.3 (0.3, 6.2)                                                 | .707    | 2.4 (0.8, 7.2)                                                 | .106    |
| Overall work impairment ≥7.3 <sup>l</sup>  | 1.4 (0.3, 6.5)                                                 | .648    | 2.0 (0.7, 5.7)                                                 | .174    |
| Activity impairment ≥8.5                   | 1.2 (0.5, 2.7)                                                 | .672    | 2.1 (1.1, 3.8)                                                 | .019    |

<sup>a</sup>NRI-NC was conducted in all Week 52 outcomes. No missing data imputation was used for HEMI and HEMR at Week 8/16.

<sup>b</sup>N = 320, includes patients who achieved a clinical response after 8 weeks or 16 weeks of upadacitinib induction treatment.

<sup>c</sup>Adjusted for maintenance baseline Geboes histologic score, dosage, gender, age, weight, UC disease extent, UC disease duration, and use of extended therapy (16-week induction period). Due to the adjustment of covariates, patients with missing values on the covariates were dropped in the logistic regressions.

<sup>d</sup>Steroid-free remission was defined as achieved 90-day steroid-free remission per adapted Mayo in patients who achieved clinical remission at the end of induction treatment.

<sup>e</sup>Sustained clinical response was defined as remained clinically responsive at the end of Week 52.

<sup>f</sup>Clinical remission per full Mayo was defined as total Mayo score ≤2 with no subscore >1.

<sup>g</sup>Clinical remission per adapted Mayo (full Mayo excluding physician's global assessment) was defined as stool frequency subscore ≤1 and not greater than baseline, rectal bleeding subscore = 0, endoscopic subscore ≤1 without friability.

<sup>h</sup>Endoscopic remission defined as Mayo endoscopic subscore = 0.

<sup>i</sup>Endoscopic improvement defined as Mayo endoscopic subscore ≤1.

<sup>j</sup>N = 275, includes only patients who achieved a clinical response after 8 weeks of upadacitinib induction treatment.

<sup>k</sup>Clinically meaningful improvement in patient-reported outcomes was assessed as the likelihood of achieving a change from induction baseline in patient-reported outcome score ≥ the corresponding meaningful within-patient change threshold.

<sup>l</sup>Only includes patients who had baseline WPAI scores. N=154 for work time missed, N=142 for impairment while working, N=154 for overall work impairment.

CI = confidence interval; EQ-5D-5L, European Quality of Life Five Dimensions Five Levels; FACIT-F = Functional Assessment of Chronic Illness Therapy–Fatigue; FCP = fecal calprotectin; HEMI = histologic endoscopic mucosal improvement; HEMR = histologic endoscopic mucosal remission; IBDQ = Inflammatory Bowel Disease Questionnaire; NRI-NC = non-responder imputation with no special data handling for missing due to COVID-19; SF-36 MCS = Short Form Health Survey Mental Component Summary; SF-36 PCS = Short Form Health Survey Physical Component Summary; UC = ulcerative colitis; UC-SQ = Ulcerative Colitis Symptoms Questionnaire; WPAI = Work Productivity and Activity Impairment questionnaire.

**Supplemental Table 3. Spearman correlations between Geboes score and secondary instruments at Baseline and Week 8.**

| Secondary measures                       | N=491 | Baseline | N=491 | Week 8 |
|------------------------------------------|-------|----------|-------|--------|
| Mayo: stool frequency subscore           | 490   | 0.17     | 443   | 0.43   |
| Mayo: rectal bleeding frequency subscore | 490   | 0.08     | 443   | 0.37   |
| Mayo: endoscopy subscore                 | 491   | 0.10     | 427   | 0.53   |
| Mayo: Physician's global assessment      | 491   | 0.13     | 444   | 0.41   |
| Mayo Full score                          | 490   | 0.20     | 424   | 0.54   |
| Mayo Partial score                       | 490   | 0.19     | 443   | 0.49   |

**Supplemental Table 4. Predictive analysis: patients with  $\geq 1$  UC-related hospitalization or surgery through the maintenance phase in U-ACHIEVE stratified by mutually exclusive HEMI and HEMR categories at Week 8/16 (end of induction)**

| At Week 8/16      | N   | $\geq 1$ UC-related hospitalization or surgery | UC-related hospitalizations | UC-related surgeries |
|-------------------|-----|------------------------------------------------|-----------------------------|----------------------|
| No HEMI           | 197 | 3                                              | 2                           | 1                    |
| HEMI without HEMR | 78  | 1                                              | 1                           | 0                    |
| HEMR              | 45  | 0                                              | 0                           | 0                    |

HEMI = histologic endoscopic mucosal improvement; HEMR = histologic endoscopic mucosal remission; N = number of patients; UC = ulcerative colitis.

**Supplemental Table 5. Cross-sectional analysis: Patients with  $\geq 1$  UC-related hospitalization or surgery through the maintenance phase in U-ACHIEVE stratified by mutually exclusive HEMI and HEMR categories at Week 52**

| <b>At Week 52</b> | <b>N</b> | <b><math>\geq 1</math> UC-related hospitalization or surgery</b> | <b>UC-related hospitalizations</b> | <b>UC-related surgeries</b> |
|-------------------|----------|------------------------------------------------------------------|------------------------------------|-----------------------------|
| No HEMI           | 77       | 2                                                                | 1                                  | 1                           |
| HEMI without HEMR | 69       | 0                                                                | 0                                  | 0                           |
| HEMR              | 55       | 0                                                                | 0                                  | 0                           |

HEMI = histologic endoscopic mucosal improvement; HEMR = histologic endoscopic mucosal remission; N = number of patients; UC = ulcerative colitis.

## **Correlation of histologic assessment of mucosal healing with long-term clinical outcomes in patients participating in the U-ACHIEVE maintenance trial**

### **METHODS**

#### **Data Source**

Geboes score (GS) and long-term clinical outcomes from the upadacitinib Phase 3 U-ACHIEVE maintenance trial (NCT02819635) were analyzed. GS intervals were selected to assess: (1) patients who achieved the threshold for histologic remission ( $GS < 2.0$ ); (2) patients who achieved the threshold for histologic improvement without remission ( $2.0 \leq GS \leq 3.1$ ) (3) patients who did not achieve histologic improvement ( $GS > 3.1$ ). Outcomes were examined in patients who achieved a clinical response after 8 or 16 weeks of upadacitinib induction treatment and received 15 mg or 30 mg QD dose of upadacitinib during maintenance.

#### **Data Analysis**

A cross-sectional analysis ( $N = 211$ ) examined the relationship of both GS intervals and outcomes at the end of maintenance (Week 52). A predictive analysis ( $N = 497$ ) assessed the relationship between GS intervals at the end of induction (Week 8/16) and outcomes at the end of maintenance (Week 52).

Odds ratios (ORs) with 95% confidence intervals (CIs) were derived from logistic regression adjusting for the following characteristics: histologic score at baseline, maintenance treatment dosage, gender, disease extent, disease duration, and baseline age and weight.

#### **Results**

Patients with histologic remission ( $GS < 2.0$ ) at Week 52 had a significantly greater likelihood of achieving all clinical outcomes at Week 52 compared to patients with  $GS > 3.1$  (Supplemental Figure 1). Patients with histologic remission ( $GS < 2.0$ ) at end of induction (Week 8/16) had a significantly higher likelihood of achieving clinical remission per adapted Mayo score ( $OR = 1.8, P < .030$ ) and endoscopic improvement ( $OR = 1.8, P < .015$ ) at Week 52 than patients with  $GS > 3.1$  (Supplemental Figure 2).



**Supplemental Figure 1. Cross-sectional analysis Adjusted ORs of Clinical Outcomes at Week 52 for GS categories at Week 52 in U-ACHIEVE**

**Maintenance Phase**

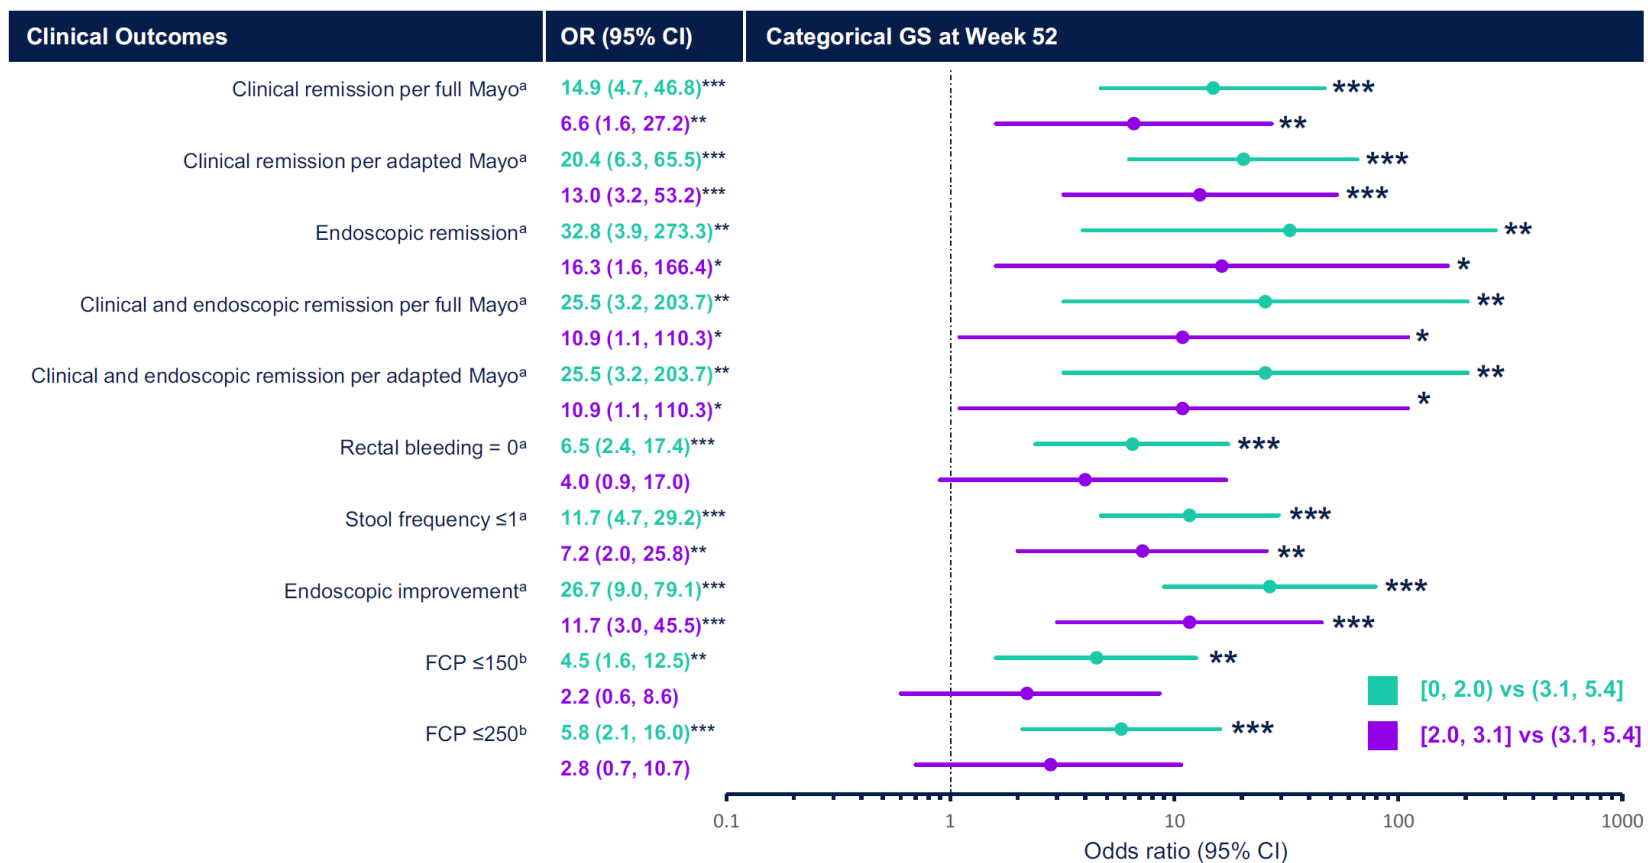

\*P <.05, \*\*P <.01, \*\*\*P <.001. An OR >1 indicates an increased likelihood, whereas an OR <1 indicates a decreased likelihood of achieving the outcome.

<sup>a</sup>N = 211, includes patients who achieved a clinical response after 8 weeks or 16 weeks of upadacitinib induction treatment.

<sup>b</sup>N = 182, includes only patients who achieved a clinical response after 8 weeks of upadacitinib induction treatment.

**Supplemental Figure 2. Predictive Analysis: Adjusted ORs of Clinical Outcomes at Week 52 for GS Categories at Week 8/16 in U-ACHIEVE**

**Induction Phase**

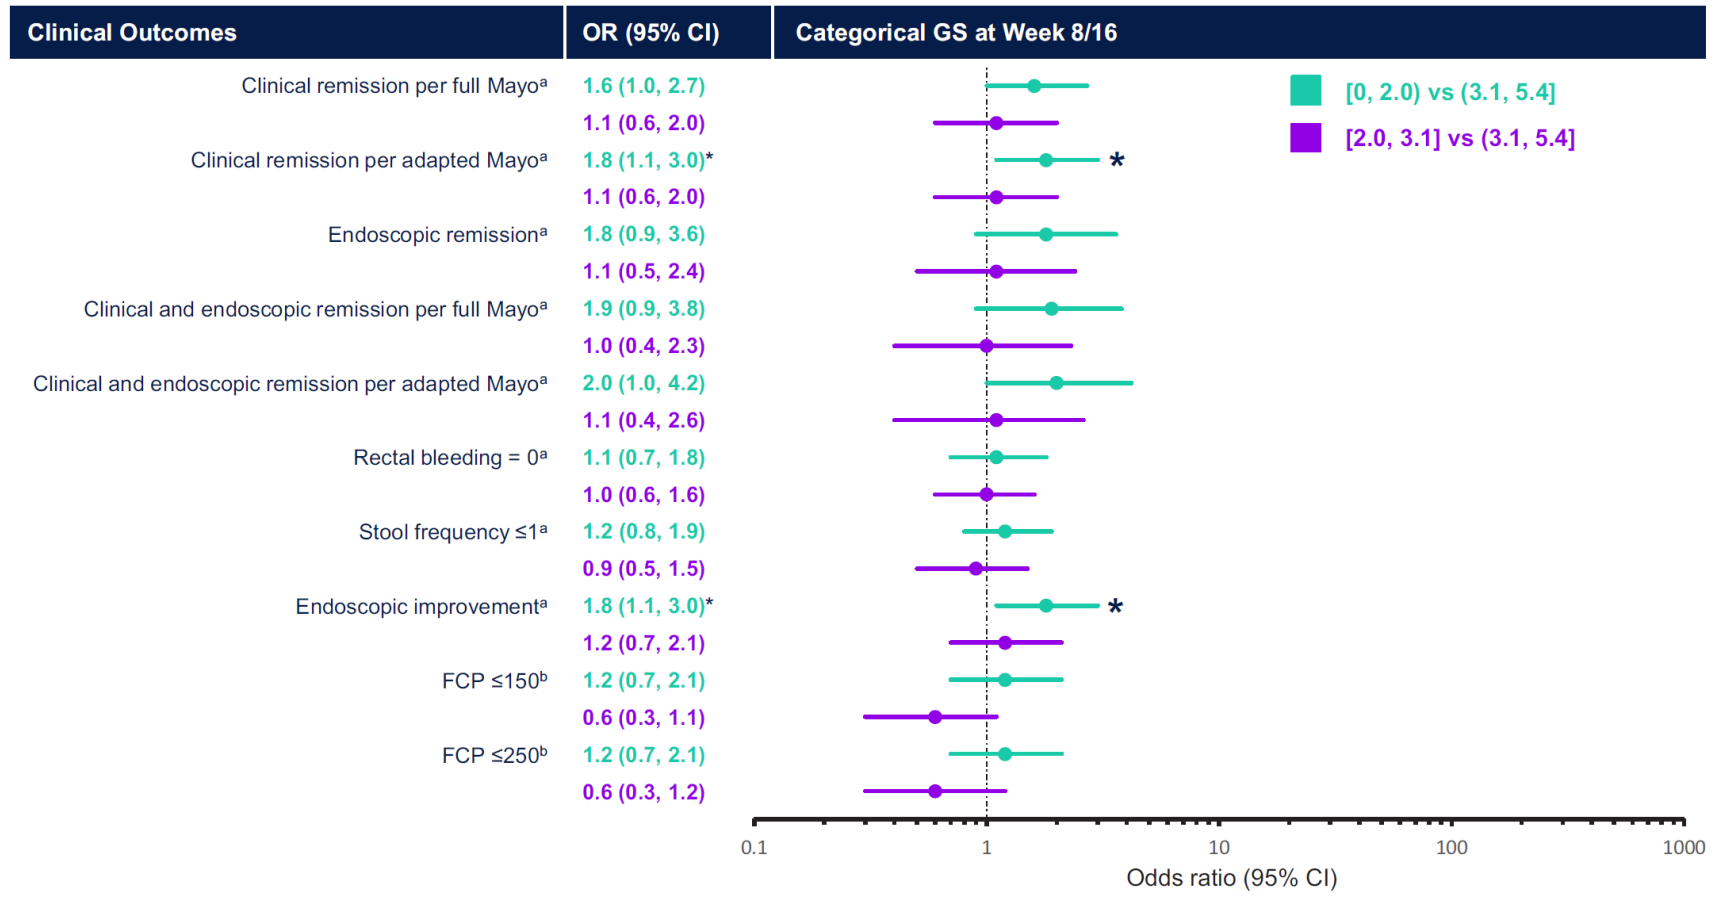

\*P <.05. An OR >1 indicates an increased likelihood, whereas an OR <1 indicates a decreased likelihood of achieving the outcome.

<sup>a</sup>N = 497, includes patients who achieved a clinical response after 8 or 16 weeks of upadacitinib induction treatment.

<sup>b</sup>N = 427, includes only patients who achieved a clinical response after 8 weeks of upadacitinib induction treatment.
